# Supplementary material for: Dapagliflozin ameliorates diabetes-induced spermatogenic dysfunction by modulating the adenosine metabolism along the gut microbiota-testis axis
Source: PubMed Central journal article supplement (PMC10770392; doi:10.1038/s41598-024-51224-2), 2024-01-05

Figure 4D

D

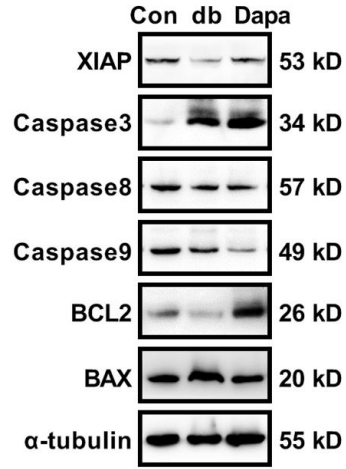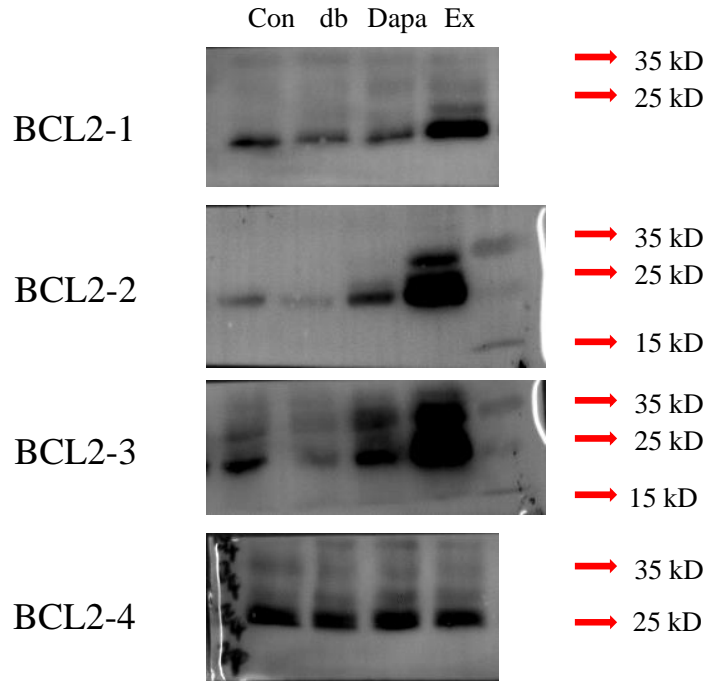

From the same gel

Used in Figure 4D

From the same gel

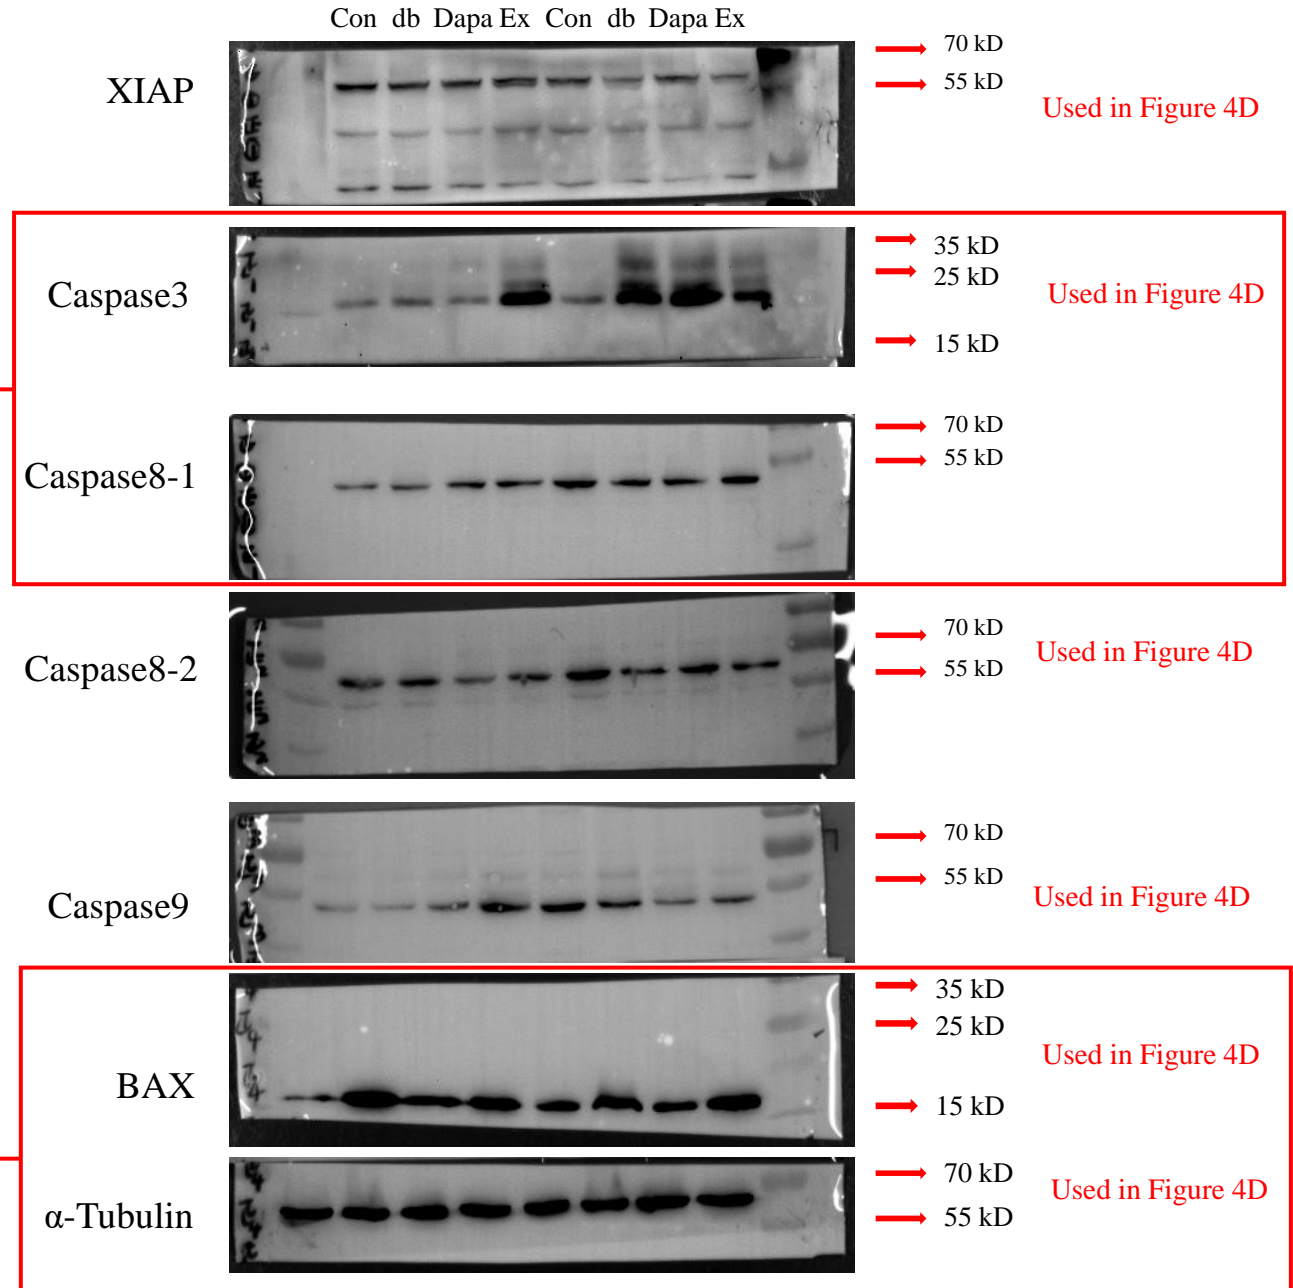

Used in Figure 4D

Figure 5E

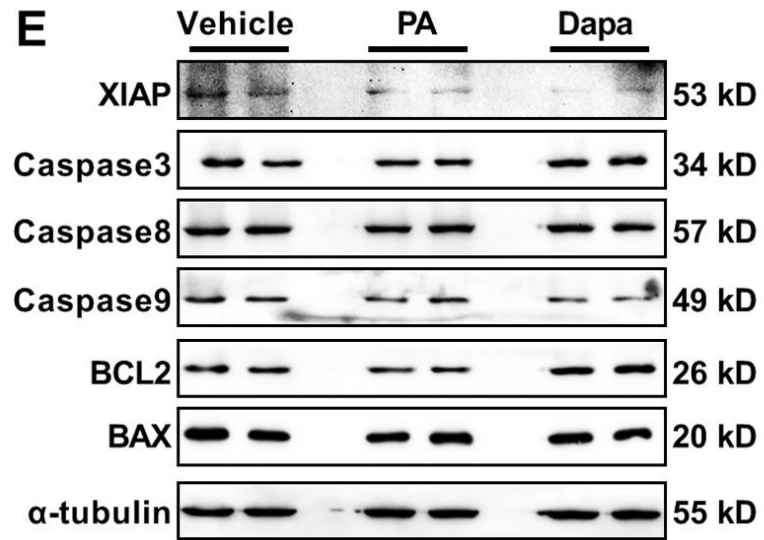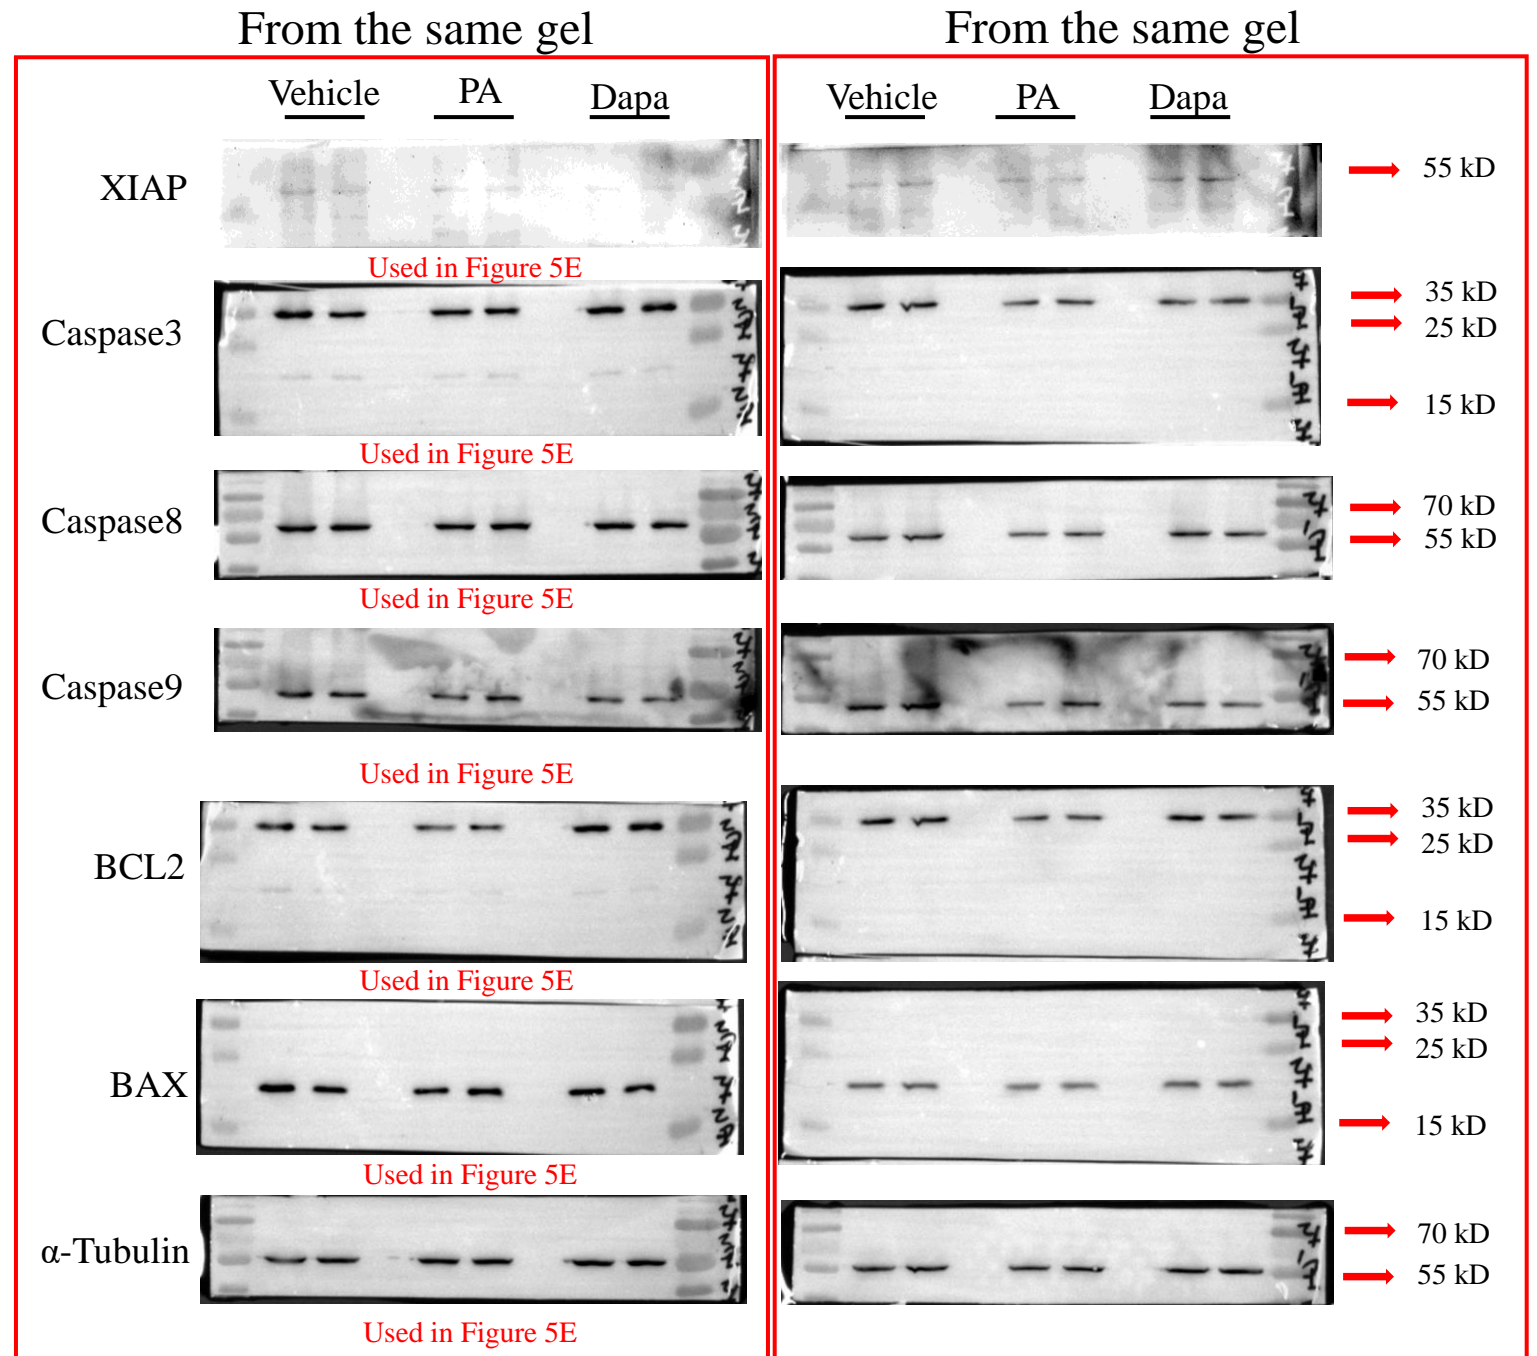

Figure 5K

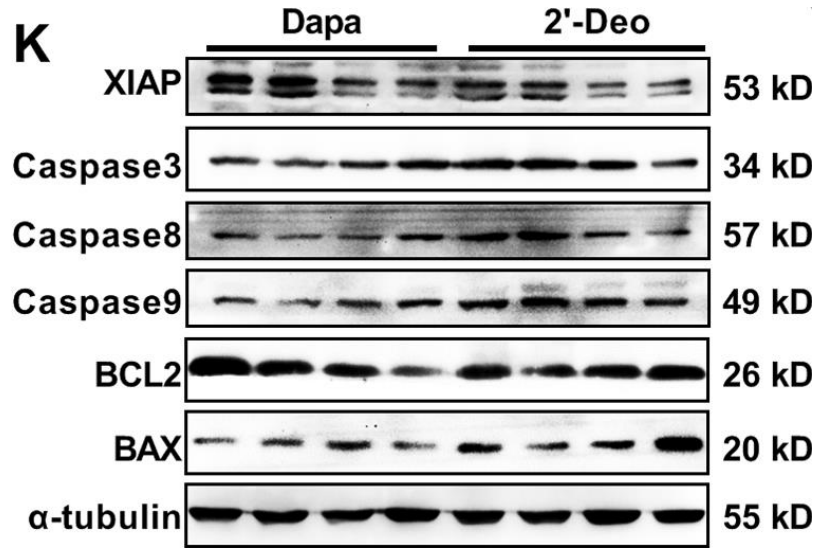

From the same gel

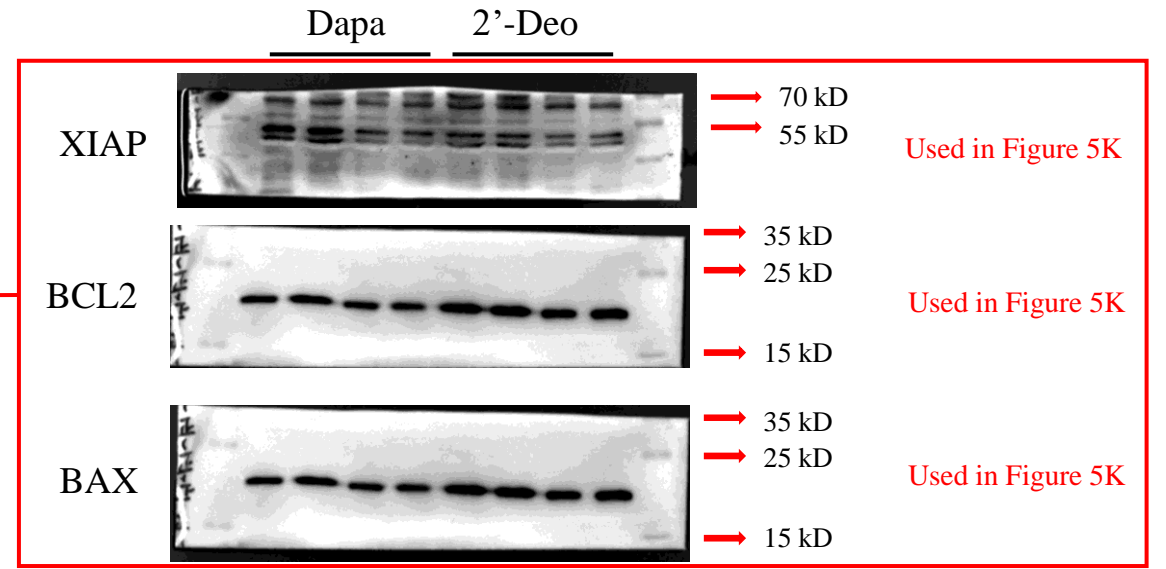

From the same gel

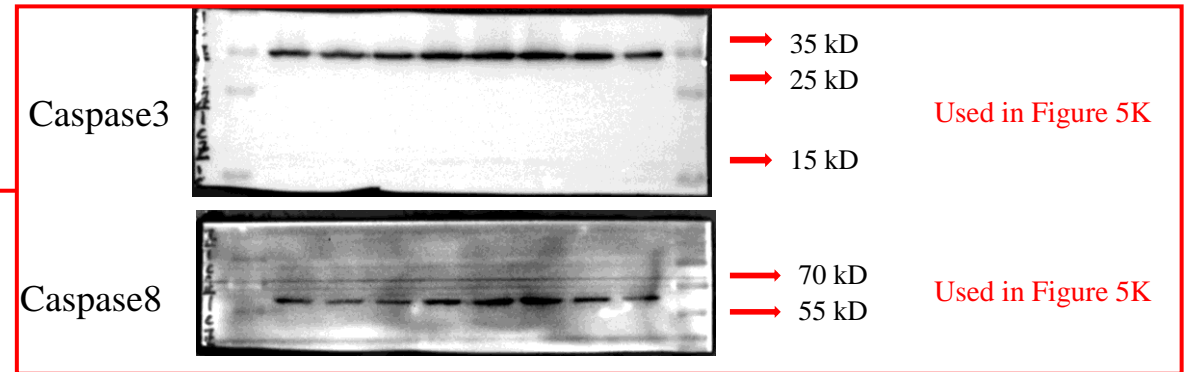

From the same gel

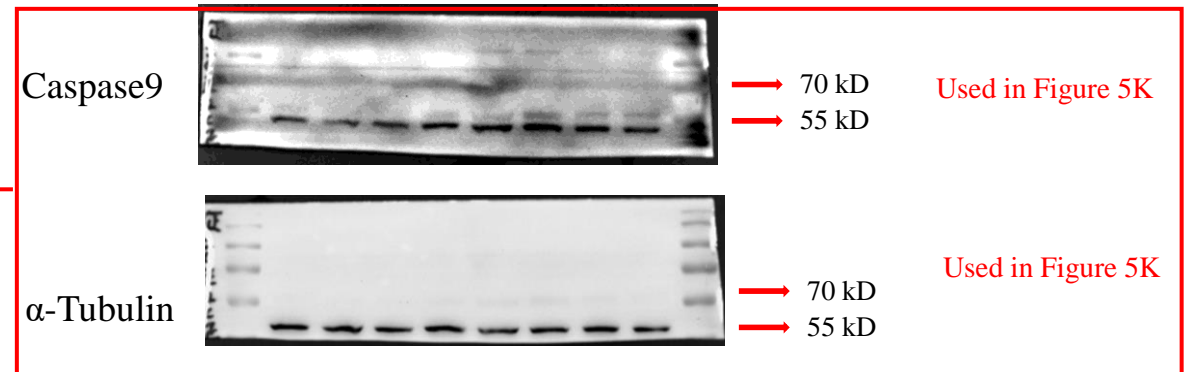

Supplement: 41598_2024_51224_MOESM1_ESM.pdf [file 41598_2024_51224_MOESM1_ESM.pdf]
